# Supplementary material for: Rapid and scalable preclinical evaluation of personalized antisense oligonucleotide therapeutics using organoids derived from rare disease patients
Source: bioRxiv or medRxiv preprint supplement (doi:10.1101/2023.03.28.23287871), 2023-03-29

# Patient 1

---

Unaffected Untreated Nontarget. Approved Phase II

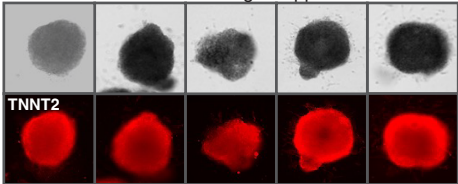

Supplement: Supplementary file [file media-2.pdf]
