# Supplementary material for: Rapid and scalable preclinical evaluation of personalized antisense oligonucleotide therapeutics using organoids derived from rare disease patients
Source: bioRxiv or medRxiv preprint supplement (doi:10.1101/2023.03.28.23287871), 2023-03-29

**a**

Patient 2a

Untreated Nontarget. ASO-1 ASO-2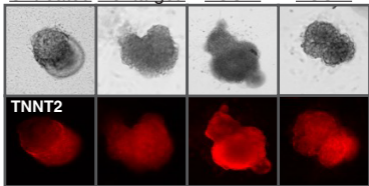**b**

Patient 2b

Untreated Nontarget. ASO-1 ASO-2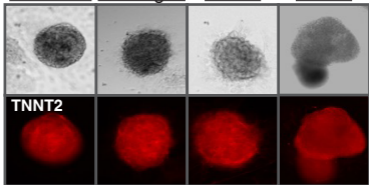

Supplement: Supplementary file [file media-5.pdf]
