# Supplementary material for: Rapid and scalable preclinical evaluation of personalized antisense oligonucleotide therapeutics using organoids derived from rare disease patients
Source: bioRxiv or medRxiv preprint supplement (doi:10.1101/2023.03.28.23287871), 2023-03-29

**a**

Patient 2a

Day 7

Day 14

Day 21

Day 28

Day 35

ASO-1

ASO-2

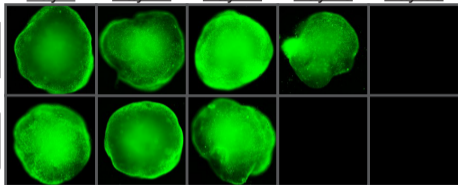**b**

Patient 2b

Day 7

Day 14

Day 21

Day 28

Day 35

ASO-1

ASO-2

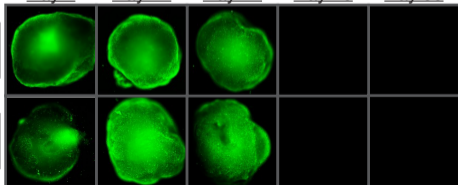

Supplement: Supplementary file [file media-7.pdf]
